# Supplementary material
Source: PubMed Central journal article supplement (PMC2749152)
Supplement: supp_M109.025155_jbc.M109.025155-1.pdf [file supp_M109.025155_jbc.M109.025155-1.pdf]

## Supplemental Fig. S1

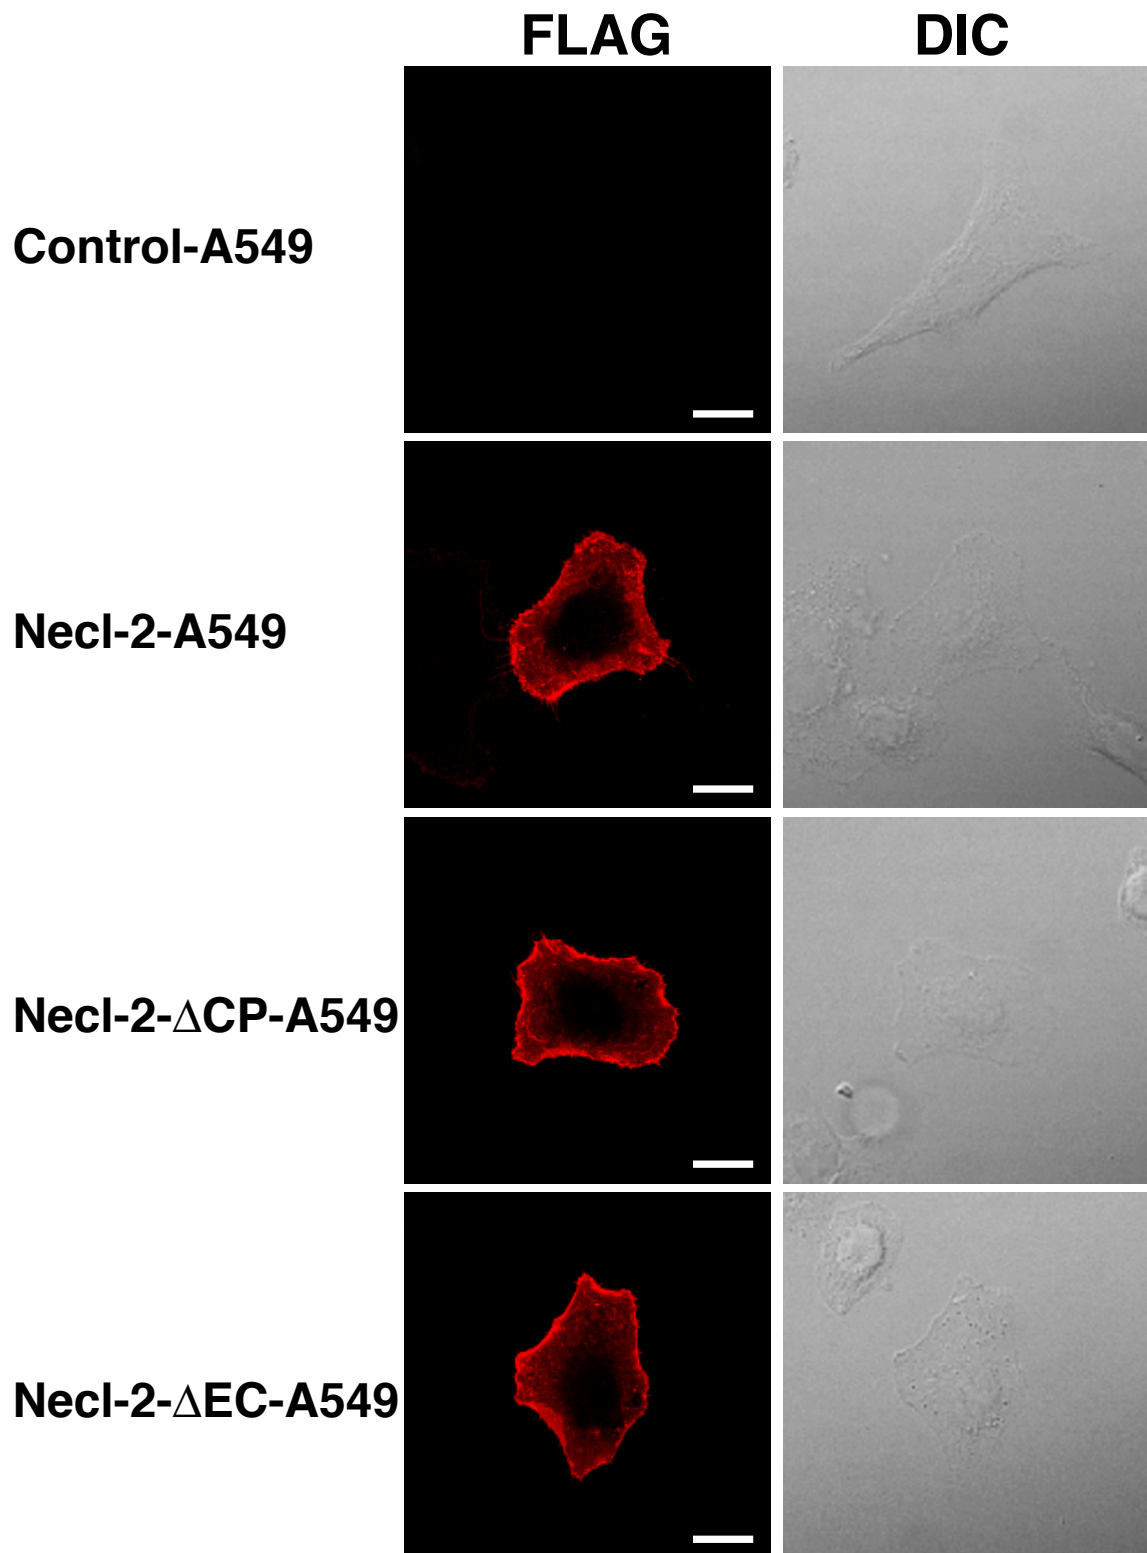

**Supplemental Fig. S1. Localization of Necl-2 mutants.** FLAG-tagged Necl-2, Necl-2- $\Delta$ CP, or Necl-2- $\Delta$ EC was transiently expressed in A549 cells. As a control, an empty vector was transfected in A549 cells. The cells were fixed using 4% paraformaldehyde/PBS without permeabilization, and then were stained with the anti-FLAG mAb. The samples were analyzed by confocal laser-scanning microscopy. *DIC*, a differential interference contrast image; *scale bars*, 10  $\mu$ m. The results shown are representative of three independent experiments.
